### Risk stratification in patients discharged for STEMI. Ejection fraction by echocardiography as the gatekeeper for a selective use of cardiac magnetic resonance

V. Marcos Garces<sup>1</sup>, J. Gavara<sup>2</sup>, M.P. Lopez-Lereu<sup>3</sup>, J.V. Monmeneu<sup>3</sup>, C. Rios-Navarro<sup>2</sup>, E. De Dios<sup>2</sup>, H. Merenciano-Gonzalez<sup>1</sup>, A. Gabaldon-Perez<sup>1</sup>, C. Bonanad<sup>1</sup>, F.J. Chorro<sup>1</sup>, F. Valente<sup>4</sup>, D. Lorenzatti<sup>5</sup>, J.F. Rodriguez-Palomares<sup>4</sup>, J.T. Ortiz<sup>5</sup>, V. Bodi<sup>1</sup>

<sup>1</sup>University Hospital Clinic of Valencia, Department of Cardiology, Valencia, Spain; <sup>2</sup>INCLIVA Biomedical Research Institute, Valencia, Spain; <sup>3</sup>ERESA, Cardiovascular Magnetic Resonance Unit, Valencia, Spain; <sup>4</sup>Vall d'Hebron University Hospital, Department of Cardiology, Barcelona, Spain; <sup>5</sup>Hospital Clinic de Barcelona, Department of Cardiology, Barcelona, Spain

**Funding Acknowledgement:** Type of funding source: Public grant(s) – National budget only. Main funding source(s): This study was funded by “Instituto de Salud Carlos III” and “Fondos Europeos de Desarrollo Regional FEDER” (PIE15/00013, PI17/01836, and CIBERCV16/11/00486 grants).

**Background:** CMR permits robust risk stratification of discharged STEMI patients but an indiscriminate use in all cases is unfeasible.

**Purpose:** We evaluated the usefulness of left ventricular ejection fraction (LVEF) by echocardiography (Echo) as the gatekeeper for identifying those patients discharged for ST-segment elevation myocardial infarction (STEMI) who benefit most from cardiac magnetic resonance (CMR) for prognostic purposes.

**Methods:** Echo and CMR were performed in 1119 patients discharged for STEMI included in a multicenter registry. The prognostic power of CMR beyond Echo-LVEF was assessed using C-statistic, net reclassification index (NRI) and integrated discrimination improvement index (IDI).

**Results:** During a 4.8-year median follow-up, 136 (12%) first major adverse cardiac events (MACE) occurred (47 cardiovascular deaths and 89 re-admissions for acute heart failure). Lesser Echo-LVEF and CMR-LVEF

associated with the occurrence of MACE but only CMR-LVEF and microvascular obstruction were independent predictors. The MACE rate significantly increased only in patients with CMR-LVEF <40% (≥50%: 7%, 40–49%: 9%, <40%: 27%, p<0.001). The majority of patients (629, 56%) displayed Echo-LVEF ≥50% and most of them (94%) were at the “safe zone” (CMR-LVEF >40%). On the other hand, 490 patients (44%) exhibited Echo-LVEF <50% and 33% of them were incorrectly classified either in the “safe zone” (CMR-LVEF ≥40%) or in the “risk zone” (CMR-LVEF <40%). C-statistic, NRI and IDI demonstrated potent reclassification for MACE prediction by CMR in patients with Echo-LVEF <50% but not in those with Echo-LVEF ≥50%.

**Conclusions:** Echo-LVEF <50% identifies the subset of discharged STEMI patients who may benefit most from CMR in terms of long-term risk prediction.

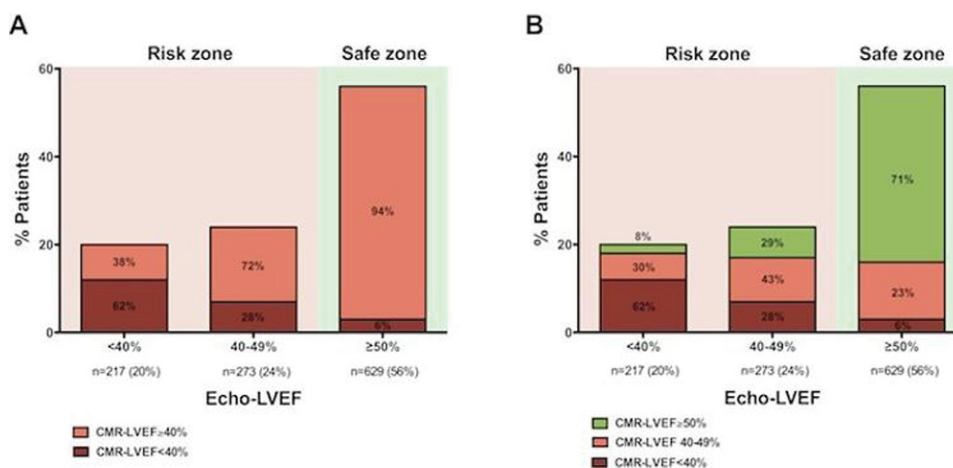

Figure 1. LVEF reclassification
